# Supplementary material for: Homology-Driven Proteomics of Dinoflagellates with Unsequenced Genomes Using MALDI-TOF/TOF and Automated De Novo Sequencing
Source: Evid Based Complement Alternat Med. 2011 Sep 29;2011:471020. doi: 10.1155/2011/471020 (PMC3184443; doi:10.1155/2011/471020)
Supplement: Supplementary file 1 — Supplementary material is a complete list of proteins identified using layered identification method includes the protein name, accession number, biological functional term and threshold value. [file 471020.f1.xls]

## Sheet: MASCOT against NCBInr database
104 proteins identified by MASCOT against NCBInr database
Spot No.	Species	Protein Name	Accession No.	Theoretical Mr (Da)	Theoretical pI	Peptide count	Protein Score	Protein Score C.I. %	Total Ion Score	Total Ion C.I. %	Peptide with Ion Score C.I.>95%
51 proteins matched in dinoflagellate
4	Prorocentrum minimum	heat shock protein 70	gi|112253644	70137.3	5.1	21	442	100	328	100	GKDLAGNQR-NPENTVFDAKR-TTPSYVAFTDTER-ARFEELNMDYFR
5	Prorocentrum minimum	heat shock protein 70	gi|112253644	70137.3	5.1	20	447	100	343	100	GKDLAGNQR-NPENTVFDAKR-TTPSYVAFTDTER-ARFEELNMDYFR
7	Prorocentrum minimum	heat shock protein 70	gi|112253644	70137.3	5.1	19	1020	100	931	100	DAGTISGMNVLR-NPENTVFDAKR-NGLENYCFTMR-TTPSYVAFTDTER-ARFEELNMDYFR-QATKDAGTISGMNVLR-KGQTFTTYADNQPGVLIQ VFEGER
15	Crypthecodinium cohnii	BiP	gi|20198944	74439.3	5.15	13	391	100	348	100	DFFNGKEPNR-TQIDEIVLVGGSTR-ITPSYVAFTEDER-ITPSYVAFTEDERLIGEAA K
17	Crypthecodinium cohnii	BiP	gi|20198944	74439.3	5.15	11	285	100	253	100	TQIDEIVLVGGSTR-ITPSYVAFTEDER
21	Heterocapsa triquetra	chloroplast transketolase	gi|58613541	84247.3	6.12	4	222	100	215	100	CTGDFLKGTYDGR-TGLVPYCATFTIFSDYMR
41	Alexandrium fundyense	hypothetical protein Tb10.6k15.3460	gi|134037090	48362.6	5.86	18	374	100	250	100	FGGGFYCAK-GTYYVFNGFFMTMR-EGKGTYYVFNGFFMTMR
42	Alexandrium fundyense	S-adenosyl-homocysteine hydrolase like protein	gi|4416330	21480.7	5.71	7	318	100	275	100	SKFDNVYGCR-FIFPDGHGIIVLASGR-AQVDRFIFPDGHGIIVLAS GR
45	Prorocentrum minimum	ribulose 1,5-bisphosphate carboxylase oxygenase large subunit	gi|33317821	50468.5	5.66	9	140	100	102	100	IAYPTALFDR
50	Heterocapsa triquetra	chloroplast ATP synthase gamma subunit	gi|58613419	46186.4	8.73	6	185	100	173	100	GSGLEAELPMLR-LKGSGLEAELPMLR
54	Heterocapsa triquetra	chloroplast ATP synthase gamma subunit	gi|58613419	46186.4	8.73	5	89	98.693	83	99.98	GSGLEAELPMLR
58	Alexandrium affine	plastid protein NAP50	gi|257480821	51888.4	5.72	7	85	96.482	73	99.837	GIWEELPKR
59	Alexandrium fundyense	actin	gi|134037068	41949	5.26	20	594	100	443	100	AGFAGDDAPR-GYSFTTTAER-AVFPSIVGRPK-GEYDESGPTIVHR-LDLAGRDLTDYLMK-FRCPEVLFQPSLIGK
61	Alexandrium fundyense	actin	gi|134037068	41949	5.26	22	960	100	779	100	AGFAGDDAPR-GYSFTTTAER-AVFPSIVGRPK-GEYDESGPTIVHR-IWHHTFYNELR-LDLAGRDLTDYLMK-FRCPEVLFQPSLIGK-TTGIVMDSGDGVSHTVPI YEGYALPHAILR
63	Heterocapsa triquetra	chloroplast glyceraldehyde-3-phosphate dehydrogenase	gi|58618206	41556.1	8.24	8	336	100	300	100	ATGIAINGFGR-AGIMLDPTFVK-LINASYDAEYLAYQMK
65	Heterocapsa triquetra	chloroplast phosphoglycerate kinase	gi|58613473	49374.9	5.31	5	142	100	130	100	LVAWYDNEWGYSCR
68	Heterocapsa triquetra	chloroplast glyceraldehyde-3-phosphate dehydrogenase	gi|58618206	41556.1	8.24	7	306	100	277	100	ATGIAINGFGR-AGIMLDPTFVK-LINASYDAEYLAYQMK
69	Amphidinium carterae	glutamate semialdehyde synthase	gi|193890955	49455.1	5.88	5	420	100	406	100	VIGGGLPVGAYGGR-MVIDAVPSVEMVR-FTNSGTEACMGMIR-IAYGGAQEYFGVTPDVTT MGK
71	Alexandrium catenella	chloroplast glyceraldehyde-3-phosphate dehydrogenase	gi|117959253	29462.4	4.9	5	390	100	367	100	AGIMIDPTFVK-VIPDVAGKLTGMAFR-GLMTTIHAMTASQPTVDG SSK
82	Alexandrium fundyense	glyceraldehyde-3-phosphate dehydrogenase	gi|134037044	36942.7	5.91	10	717	100	648	100	PATLGINGFGR-VPTPDVSVVDLTCR-VIPDVNGKLTGMAFR-LVSWYDNEWGYSNR-ASSIFDVGAGISLSDTFVK
85	Alexandrium fundyense	glyceraldehyde-3-phosphate dehydrogenase	gi|134037044	36942.7	5.91	12	432	100	355	100	PATLGINGFGR-VPTPDVSVVDLTCR-LVSWYDNEWGYSNR
86	Alexandrium fundyense	glyceraldehyde-3-phosphate dehydrogenase	gi|134037044	36942.7	5.91	4	88	98.111	75	99.881	PATLGINGFGR
102	Karenia brevis	plastid fructose-1,6-bisphosphate aldolase class II protein precursor	gi|104641008	47044.2	5.32	3	116	99.997	109	100	LYGVPVILHTDHCQK
105	Pyrocystis lunula	chloroplast phosphoribulokinase	gi|60101676	46057.8	5.5	9	168	100	132	100	GWTEEQVR-YEPSDQGLPYLK
107	Pyrocystis lunula	chloroplast phosphoribulokinase	gi|60101676	46057.8	5.5	10	182	100	138	100	GWTEEQVR-YEPSDQGLPYLK
110	Karlodinium micrum	beta-tubulin	gi|157093091	50725.3	4.79	20	1020	100	854	100	YLTAAALFR-FPGQLNCDLR-VAEYFTAMFR-FPGQLNCDLRK-INVYYNEATGGR-LHFFMTGFAPLTSR-MAVAFAGNSTAIQEMFKR -MRELVHIQGGQCGNQIG AK-AGPFGQLFRPDNFVFGQ TGAGNNWAK
114	Heterocapsa triquetra	calrectulin	gi|58613583	27341.4	4.99	6	235	100	209	100	SDLAYKQEGEGTSHLYR
121	Pyrocystis lunula	chloroplast phosphoribulokinase	gi|60101676	46057.8	5.5	10	150	100	68	99.327	YEPSDQGLPYLK
133	Alexandrium fundyense	threonine endopeptidase	gi|134037046	28247.2	5.79	9	234	100	177	100	HAGMSIAGFSADSR
136	Alexandrium fundyense	plastid oxygen-evolving enhancer 1-2 precursor	gi|134037072	29748.6	9.24	5	136	100	115	100	LTNLCFEPK
139	Alexandrium fundyense	plastid oxygen-evolving enhancer 1-2 precursor	gi|134037072	29748.6	9.24	6	88	98	58	95.048	LTNLCFEPK
142	Alexandrium fundyense	plastid oxygen-evolving enhancer 1-2 precursor	gi|134037072	29748.6	9.24	5	114	99.996	93	99.998	LTNLCFEPK
155	Alexandrium fundyense	DNA damage checkpoint protein rad24	gi|134037084	27341.6	4.91	21	977	100	777	100	DKEVYFAK-DLAVTHPIR-VNEELSVEER-YIAEFSDGDKK-VAEKDLAVTHPIR-LAEQAERYDEMASHMEAVGK -TAFEDAIAELDNVAEDSY KDSTLIMQLLR
158	Alexandrium tamarense	heat shock protein 90	gi|99643822	67005.1	5.15	10	524	100	494	100	EDQSEFLEER-ELISNASDALDKIR-VICYLKEDQSEFLEER-YESITDPEKIEAQPNFYIK
163	Noctiluca scintillans	conserved hypothetical protein	gi|157093395	23564.8	6.71	2	91	99.212	85	99.978	IEQTVGHGLAILR
174	Amphidinium carterae	light-harvesting polyprotein precursor	gi|3355306	88130.9	5.93	5	95	99.632	86	99.983	VAMLATMGYITPEITGK
181	Alexandrium tamarense	chlorophyll a/c- binding protein	gi|53748880	11794.9	7.97	2	96	99.707	85	99.988	LNAELANGR
182	Alexandrium tamarense	chlorophyll a/c- binding protein	gi|53748880	11794.9	7.97	2	92	99.374	82	99.977	LNAELANGR
184	Amphidinium carterae	light-harvesting polyprotein precursor	gi|3355306	88130.9	5.93	3	105	99.966	105	100	VAMLATMGYITPEITGK
185	Amphidinium carterae	light-harvesting polyprotein precursor	gi|3355306	88130.9	5.93	3	122	100	122	100	LSGEFSVIGR
186	Amphidinium carterae	light-harvesting polyprotein precursor	gi|3355306	88130.9	5.93	5	104	99.957	97	100	VAMLATMGYITPEITGK
187	Heterocapsa triquetra	chloroplast light harvesting complex protein	gi|58613559	23020.4	5.46	1	120	99.999	116	100	ISMLATMGYITPEITGK
193	Alexandrium tamarense	chlorophyll a/c- binding protein	gi|53748880	11794.9	7.97	1	87	97.676	82	99.962	LNAELANGR
194	Amphidinium carterae	light-harvesting chlorophyll a-c binding protein	gi|757520	19981.9	5.26	4	123	100	76	99.891	LNSEIANGR
198	Amphidinium carterae	light-harvesting chlorophyll a-c binding protein	gi|757520	19981.9	5.26	7	188	100	146	100	LNSEIANGR-FPGYLSPSMGLK
214	Alexandrium tamarense	chlorophyll a/c- binding protein	gi|53748880	11794.9	7.97	1	87	97.621	82	99.973	LNAELANGR
215	Alexandrium tamarense	chlorophyll a/c- binding protein	gi|53748880	11794.9	7.97	1	90	98.862	85	99.988	LNAELANGR
CR1	Prorocentrum minimum	ribulose 1,5-bisphosphate carboxylase oxygenase form II	gi|37731851	39063.2	6.72	4	136	100	119	100	IAYPTALFDR
CR2	Prorocentrum minimum	ribulose 1,5-bisphosphate carboxylase oxygenase form II	gi|37731851	39063.2	6.72	5	141	100	133	100	IAYPTALFDR-GYTAFVHTK
CR3	Prorocentrum minimum	ribulose 1,5-bisphosphate carboxylase oxygenase form II	gi|37731851	39063.2	6.72	4	156	100	143	100	IAYPTALFDR-GYTAFVHTK
CR4	Prorocentrum minimum	ribulose 1,5-bisphosphate carboxylase oxygenase form II	gi|37731851	39063.2	6.72	4	140	100	136	100	IAYPTALFDR
9 proteins matched in non-dinoflagellate algae
16	Micromonas pusilla CCMP1545	H+-or Na+-translocating f-type, v-type and A-type ATPase superfamily	gi|226463106	69244.2	5.69	10	317	100	282	100	WAEALREISGR-LAEMPADAGYPAYLGAR
35	Thalassiosira pseudonana CCMP1335	probable S-adenosylmethionine synthetase	gi|223998420	50954.4	5.19	8	304	100	274	100	FIIGGPQGDAGLTGR-FIIGGPQGDAGLTGRK
36	Ditylum brightwellii	methionine S-adenosyl transferase	gi|225685863	51249.2	5.2	6	150	100	131	100	FIIGGPQGDAGLTGR
37	Thalassiosira pseudonana CCMP1335	probable S-adenosylmethionine synthetase	gi|223998420	50954.4	5.19	7	272	100	247	100	FIIGGPQGDAGLTGR-FIIGGPQGDAGLTGRK
39	Detonula confervacea	methionine S-adenosyl transferase	gi|225685865	51075.4	5.73	8	277	100	247	100	FIIGGPQGDAGLTGR-FIIGGPQGDAGLTGRK
55	Micromonas pusilla CCMP1545	predicted protein	gi|226460043	46764.8	8.73	4	84	95.144	76	99.91	QKGADGLLLR
56	Prochlorococcus marinus str. MIT 9312	elongation factor Tu	gi|78779984	43825.2	4.97	5	83	94.915	66	98.731	GITINTAHVEYETEGR
57	Pycnococcus provasolii	translational elongation factor Tu	gi|224179460	44894.6	4.79	2	88	98.277	63	98.1	GITINTAHVEYETETR
216	Synechococcus sp. BL107	photosystem I subunit VII	gi|116071645	11378.3	5.57	4	196	100	171	100	CETACPTDFLSIR-RCETACPTDFLSIR
44 proteins matched in other organism species
1	Picea sitchensis	unknown	gi|148907083	75843.4	5.46	9	208	100	161	100	IAGLEVLR-AVITVPAYFNDSQR
2	Theileria annulata strain Ankara	heat shock protein HSP70 homologue	gi|84994486	74313.5	5.95	8	296	100	274	100	IAGLEVLR-DAGKIAGLEVLR-AVITVPAYFNDSQR
6	Toxoplasma gondii ME49	heat shock protein 70, putative	gi|237836239	78544.4	6.85	11	212	100	122	100	HLQVKLTR-QAVTNPENTVFATKR
8	Vitis vinifera	unnamed protein product	gi|270226122	37648.4	8.48	4	103	99.946	90	99.997	IVAWYDNEWGYSSR
9	Vitis vinifera	unnamed protein product	gi|270226122	37648.4	8.48	4	103	99.946	90	99.997	IVAWYDNEWGYSSR
10	Trichinella spiralis	heat shock protein 60	gi|21105712	62754.6	6.55	8	116	99.997
12	Prunus dulcis	heat shock protein 60	gi|24637539	58069.6	5.26	9	123	100	97	100	NVVLEQSFGAPK
14	Vitis vinifera	PREDICTED: similar to GroEL-like chaperone, ATPase	gi|225433375	61673.5	5.85	9	204	100	179	100	NVVLEQSFGAPK-GRNVVLEQSFGAPK
19	Pseudomonas stutzeri A1501	pseudouridine synthase	gi|146282670	33803.4	10.02	10	84	95.77
24	Solanum lycopersicum	enolase	gi|1161573	35301.2	6.29	4	167	100	134	100	SGETEDTFIADLAVGLST GQIK
28	Perkinsus marinus ATCC 50983	conserved hypothetical protein	gi|239897902	68925.6	6.67	11	237	100	196	100	NSEGEPFMAR-LGANSLLDLVVFGR
38	Danio rerio	methionine adenosyltransferase-like	gi|94536641	43548	6.38	6	259	100	241	100	FLLGGPQGDAGLTGR-FLLGGPQGDAGLTGRK
44	Toxoplasma gondii	putative vacuolar H+ ATPase subunit B	gi|27901531	45380.9	5.59	7	343	100	315	100	QIYPPINVLPSLSR-GYPGYMYTDLSTIYER-IPLFSAAGLPHNEIGAQIC R
46	Onchocerca volvulus	enolase	gi|32440997	47465	6.04	7	101	99.914	55	90.112	GNPTVEVDLTTEKGIFR
47	Proteus mirabilis ATCC 29906	ketol-acid reductoisomerase	gi|227357190	54417.2	5.13	7	96	99.757	74	99.877	IRDDITVVMVAPK
48	Amphitrite ornata	Chain A, The Crystal Structure And Amino Acid Sequence Of Dehaloperoxidase From Amphitrite Ornata Indicate Common Ancestry With Globins	gi|8569636	15575.7	8.01	3	86	97.14	74	99.87	VFNLMMEVADR
49	Plasmodium chabaudi chabaudi	26S protease subunit regulatory subunit 6a	gi|70951687	51039.3	5.03	11	133	100	89	99.995	VIAATNRPDTLDPALLR
51	Campylobacter upsaliensis RM3195	glyceraldehyde-3-phosphate dehydrogenase, type I	gi|57505272	36711.8	5.84	5	125	100	109	100	IVAWYDNEWGYSSR
60	Campylobacter upsaliensis RM3195	glyceraldehyde-3-phosphate dehydrogenase, type I	gi|57505272	36711.8	5.84	3	108	99.983	99	100	IVAWYDNEWGYSSR
64	Paramecium tetraurelia strain d4-2	hypothetical protein	gi|145541453	47284.1	8.97	16	85	96.864
67	Paramecium tetraurelia strain d4-2	Superoxide dismutase	gi|145532645	20578.1	5.92	3	90	99.031	77	99.885	EGVNDNEEGFFSAR
70	Polaromonas naphthalenivorans CJ2	hypothetical protein Pnap_4911	gi|121583281	104797	9.16	11	93	99.455	75	99.81	NQLVQEMAR
74	Toxoplasma gondii ME49	ATP-dependent helicase, putative	gi|237831253	45610.2	5.97	9	471	100	439	100	GFKEQVYDIYR-GVAINFVKNDDIR-DELTLEGIKQFFVAVER
76	Mus musculus	predicted gene, EG668137	gi|218505708	47109.3	7.03	9	137	100	90	99.994	MLVLDEADEMLNR
78	Polaromonas naphthalenivorans CJ2	hypothetical protein Pnap_4911	gi|121583281	104797	9.16	10	89	98.533	73	99.677	NQLVQEMAR
79	Olea europaea	geranylgeranyl reductase	gi|89474863	51283.5	9.07	8	159	100	79	99.923	CSGEGIYFAAK
93	Medicago sativa	malate dehydrogenase precursor	gi|2827080	36003.1	8.8	4	201	100	187	100	DDLFNINAGIVK-KPGMTRDDLFNINAGIVK
95	Nicotiana tabacum	putative mitochondrial malate dehydrogenase	gi|48375044	22194.6	7.64	4	194	100	176	100	DDLFNINAGIVK-KPGMTRDDLFNINAGIVK
97	uncultured eukaryote	form II ribulose-1,5-bisphosphate carboxylase/oxygenase large subunit	gi|209575510	15505.9	9.43	5	89	98.599	42	0
106	Mytilus galloprovincialis	actin	gi|5114428	42118.9	5.46	8	104	99.957	66	99.241	SYELPDGQVITIGNER
109	Candidatus Pelagibacter ubique HTCC1062	F0F1 ATP synthase subunit beta	gi|71082935	50810.3	4.91	10	451	100	401	100	FTQAGSEVSALLGR-AALVYGQMNEPPGAR-QIAEIGIYPAVDPLDSTSR
120	Pyrocystis lunula	chloroplast phosphoribulokinase	gi|60101676	46057.8	5.5	8	84	96.142
122	Labrenzia aggregata IAM 12614	delta-aminolevulinic acid dehydratase	gi|118587975	37874.9	4.84	7	89	98.752
129	Perkinsus marinus ATCC 50983	hypothetical protein Pmar_PMAR003554	gi|239897329	12935.9	10.45	9	88	98.237
146	Bacillus clausii KSM-K16	glyceraldehyde-3-phosphate dehydrogenase	gi|56964470	37426.1	5.94	5	89	98.662	71	99.469	VLAWYDNEWGYSCR
147	Vitis vinifera	PREDICTED: hypothetical protein	gi|225464033	35255.4	5.83	3	117	99.998	110	100	NVNEGFSGGER
152	Anaeromyxobacter dehalogenans 2CP-C	ribulose-5-phosphate 3-epimerase	gi|86160387	23621.5	5.98	4	110	99.989	92	99.998	FVPNITIGPLVVEAVR
169	Perkinsus marinus ATCC 50983	conserved hypothetical protein	gi|239885075	19115.2	4.74	3	128	100	115	100	IEQTVGHGLAVLR
171	Ovis aries	ADP-ribosylation factor-like 2	gi|242247487	21060.9	6.32	6	99	99.869	73	99.735	LLMLGLDNAGK
188	Chaetomium globosum CBS 148.51	hypothetical protein CHGG_06467	gi|116193499	254365	5.2	24	84	95.961			VAMLATMGYITPEITGK
197	Trypanosoma brucei gambiense DAL972	hypothetical protein, conserved	gi|261334958	64337.1	5.91	15	86	97.566
208	Aplysia californica	pannexin 2	gi|54398902	49213.1	8.37	15	86	97.269
209	Coprinopsis cinerea okayama7#130	hypothetical protein CC1G_03516	gi|169851626	142549	5.29	8	122	100	87	99.992	NVESGFGGKSDPYVR
212	Labrenzia aggregata IAM 12614	cell division protein FtsZ	gi|118590886	62615.5	4.84	6	93	99.48	59	93.782	RPMGLLR

## Sheet: Database-search against EST
72 proteins with significant hit by database-search against dinoflagellate EST database
Spot No.	Accession No.	Blastx Protein Name[species]	Blastx E-value	EST Sequence Number/Species	Total Ion Score	Total Ion C. I. %
43 proteins matched in dinoflagellates
40	gi|211939908	adenosylhomocysteinase [Amphidinium carterae]	5e-101	sqf6a0fd3e /Alexandrium catenella ACC07	189	100
52	gi|257480821	plastid protein NAP50 [Alexandrium affine]	5e-78	sqaef34603/ Alexandrium catenella ACC07	75	99.999
72	gi|56112311	cytosolic class II fructose bisphosphate aldolase[Heterocapsa triquetra]	4e-89	sqf325dc67/ Alexandrium catenella ACC07	418	100
73	gi|56112311	cytosolic class II fructose bisphosphate aldolase [Heterocapsa triquetra]	4e-89	sqf325dc67/ Alexandrium catenella ACC07	349	100
80	gi| 58613455	chloroplast ferredoxin-NADP{+) reductase [Heterocapsa triquetra]	2e-70	sq8f7fa01a /Alexandrium catenella ACC07	121	100
83	gi| 58613455	chloroplast ferredoxin-NADP{+) reductase [Heterocapsa triquetra]	2e-70	sq8f7fa01a/ Alexandrium catenella ACC07	155	100
84	gi| 58613455	chloroplast ferredoxin-NADP{+) reductase [Heterocapsa triquetra]	3e-106	sq81d166a1/ Alexandrium catenella ACC07	178	100
87	gi| 58613455	chloroplast ferredoxin-NADP{+) reductase [Heterocapsa triquetra]	2e-70	sq8f7fa01a/ Alexandrium catenella ACC07	155	100
88	gi| 58613455	chloroplast ferredoxin-NADP{+) reductase [Heterocapsa triquetra]	2e-70	sq8f7fa01a/ Alexandrium catenella ACC07	208	100
89	gi| 58613455	chloroplast ferredoxin-NADP{+) reductase [Heterocapsa triquetra]	2e-70	sq8f7fa01a /Alexandrium catenella ACC07	155	100
90	gi| 58613455	chloroplast ferredoxin-NADP{+) reductase [Heterocapsa triquetra]	3e-55	ZooX20008J16.g_056/Symbiodinium	44	98.435
91	gi| 58613455	chloroplast ferredoxin-NADP{+) reductase [Heterocapsa triquetra]	4e-83	sqb1f26037/ Alexandrium catenella ACC07	211	100
98	gi|193890884	truncated actin [Amphidinium carterae]	5e-118	Ac1063 /Amphidinium carterae	234	100
101	gi|75284311	chloroplast RuBisCO form II [Heterocapsa triquetra]	1e-131	sq9cee9613/ Alexandrium catenella ACC07	195	100
108	gi|60101678	chloroplast phosphoribulokinase 2 [Pyrocystis lunula]	1e-81	UI-D-GC1-abd-d-14-0-UI.s1 UI-D-GC1/Alexandrium tamarense	88	100
112	gi|156144851	beta-tubulin [Karenia brevis]	6e-137	est_k_brevis2875 /Karenia brevis	71	99.997
113	gi|193890965	nucleoredoxin [Amphidinium carterae]	1e-76	sq7da1f79f /Alexandrium catenella ACC07	97	100
125	gi|58613475	phosphoglycerate kinase [Heterocapsa triquetra]	8e-71	sqcfb5e9c5/ Alexandrium catenella ACC07	51	99.822
140	gi|134037072	plastid oxygen-evolving enhancer 1-2 precursor [Alexandrium fundyense]	1e-89	sqb8622231/ Alexandrium catenella ACC07	59	99.968
144	gi|157093165	triose-phosphate isomerase [Karlodinium micrum]	2e-45	UI-D-GC1-abk-j-23-0-UI.s1 UI-D-GC1/Alexandrium tamarense	90	100
150	gi|161898187	conserved hypothetical protein [Prorocentrum minimum]	8e-26	UI-D-GC1-aas-k-23-0-UI.s1 UI-D-GC1/Alexandrium tamarense	219	100
151	gi|56112311	cytosolic class II fructose bisphosphate aldolase [Heterocapsa triquetra]	4e-89	sqf325dc67 /Alexandrium catenella ACC07	56	99.947
153	gi|157093165	triose-phosphate isomerase [Karlodinium micrum]	6e-45	UI-D-GC1-aax-g-14-0-UI.s1 UI-D-GC1/Alexandrium tamarense	309	100
157	gi|75284311	Ribulose bisphosphate carboxylase, chloroplastic; [Heterocapsa triquetra]	7e-129	sq8454180b/ Alexandrium catenella ACC07	206	100
159	gi|58613603	unknown protein [Heterocapsa triquetra]	1e-25	UI-D-GC1-aal-j-02-0-UI.s1 UI-D-GC1/Alexandrium tamarense	108	100
160	gi|306430557	light-harvesting protein [Symbiodinium sp. clade C3]	3e-47	UI-D-GC1-abb-k-12-0-UI.s1 UI-D-GC1/Alexandrium tamarense	383	100
161	gi|306430557	light-harvesting protein [Symbiodinium sp. clade C3]	3e-43	sq16c46323 /Alexandrium catenella ACC07	365	100
162	gi|112253632	single domain cyclophilin-type peptidyl-prolyl cis-trans protein [Prorocentrum minimum]	5e-45	UI-D-GC1-aaz-n-22-0-UI.s1 UI-D-GC1/Alexandrium tamarense	314	100
166	gi|58613553	chloroplast light harvesting complex protein [Heterocapsa triquetra]	9e-86	sqd247bc4a/Alexandrium catenella ACC07	101	100
176	gi|306430565	light-harvesting protein [Symbiodinium sp. clade C3]	8e-69	UI-D-GC1-aad-h-21-0-UI.s1 UI-D-GC1/Alexandrium tamarense	467	100
177	gi|306430565	light-harvesting protein [Symbiodinium sp. clade C3]	8e-69	UI-D-GC1-aad-h-21-0-UI.s1 UI-D-GC1/Alexandrium tamarense	267	100
178	gi|58613553	chloroplast light harvesting complex protein [Heterocapsa triquetra]	2e-73	UI-D-GC1-aat-p-19-0-UI.s1 UI-D-GC1/Alexandrium tamarense	365	100
179	gi|58613553	chloroplast light harvesting complex protein [Heterocapsa triquetra]	2e-73	UI-D-GC1-aat-p-19-0-UI.s1 UI-D-GC1/Alexandrium tamarense	113	100
180	gi|58613547	chloroplast light harvesting complex protein [Heterocapsa triquetra]	3e-49	UI-D-GC1-aao-f-08-0-UI.s1 UI-D-GC1/Alexandrium tamarense	227	100
183	gi|58613573	chloroplast light harvesting complex protein [Heterocapsa triquetra]	7e-56	sqc7b8fa81 /Alexandrium catenella ACC07	132	100
190	gi|306430549	light-harvesting protein [Symbiodinium sp. clade C3]	6e-58	sq6882d0e9 /Alexandrium catenella ACC07	129	100
191	gi|27450755	chlorophyll A-C binding protein [Pyrocystis lunula]	4e-43	sq6882d0e9 /Alexandrium catenella ACC07	337	100
192	gi|27450755	chlorophyll A-C binding protein [Pyrocystis lunula]	2e-66	UI-D-GC1-aad-m-17-0-UI.s1 UI-D-GC1/ Alexandrium tamarense	264	100
195	gi|306430557	light-harvesting protein [Symbiodinium sp. clade C3]	8e-35	sq20ea8b7f/ Alexandrium catenella ACC07	58	99.943
199	gi|306430557	light-harvesting protein [Symbiodinium sp. clade C3]	5e-33	sq23a466f5 /Alexandrium catenella ACC07	210	100
200	gi|306430557	light-harvesting protein [Symbiodinium sp. clade C3]	3e-74	sqd2898f45 /Alexandrium catenella ACC07	102	100
201	gi|58613435	chloroplast cytochrome b6 [Heterocapsa triquetra]	3e-53	UI-D-GC1-aax-f-05-0-UI.s1 UI-D-GC1/Alexandrium tamarense	178	100
213	gi|3355306	light-harvesting polyprotein precursor [Amphidinium carterae]	4e-67	sqb1dd5055 /Alexandrium catenella ACC07	177	100
8 proteins matched in non-dinoflagellate algae
13	gi|57335913	phosphoglucomutase [Guillardia theta]	4e-32	sq7185975c /Alexandrium catenella ACC07	66	99.993
62	gi|159472657	predicted protein [Chlamydomonas reinhardtii]	8e-41	sq057b02d5 /Alexandrium catenella ACC07	227	100
66	gi|82658842	copper/zinc superoxide dismutase [Ulva fasciata]	4e-52	UI-D-GC0-aaa-o-05-0-UI.s1 UI-D-GC0 /Alexandrium tamarense	264	100
104	gi|219114000	fructose-bisphosphate aldolase [Phaeodactylum tricornutum CCAP]	6e-45	sqc3d376fc /Alexandrium catenella ACC07	49	99.441
132	gi|224005631	inorganic pyrophosphatase [Thalassiosira pseudonana CCMP1335]	9e-61	sq45b77876/ Alexandrium catenella ACC07	123	100
145	gi|224014250	glutathione s-transferase [Thalassiosira pseudonana CCMP1335]	8e-29	UI-D-GC1-aao-f-13-0-UI.s1 UI-D-GC1 /Alexandrium tamarense	243	100
154	gi|223995719	predicted protein [Thalassiosira pseudonana CCMP1335]	4e-34	Ac6374 /Amphidinium carterae	64	99.993
210	gi|118411006	PsbV [Phaeodactylum tricornutum]	2e-33	UI-D-GC0-aaa-d-18-0-UI.r2 UI-D-GC0 /Alexandrium tamarense	97	100
21 proteins matched in other organism species
27	gi|182420159	glutamine synthetase, catalytic region [Clostridium butyricum 5521]	5e-28	sq76cdd64d/ Alexandrium catenella ACC07	137	100
29	gi|301111828	isocitrate lyase [Phytophthora infestans T30-4]	7e-37	Ac1127r /Amphidinium carterae	75	99.999
30	gi|294868298	conserved hypothetical protein [Perkinsus marinus ATCC 50983]	4e-124	sqd3123b76 /Alexandrium catenella ACC07	221	100
31	gi|119383846	glucose-methanol-choline oxidoreductase [Paracoccus denitrificans PD1222]	3e-26	sq80e9a916/ Alexandrium catenella ACC07	155	100
32	gi|262095323	isocitrate lyase [Phytophthora infestans T30-4]	2e-77	sq381189f2/ Alexandrium catenella ACC07	242	100
33	gi|262095323	isocitrate lyase [Phytophthora infestans T30-4]	2e-77	sq381189f2/ Alexandrium catenella ACC07	449	100
34	gi|262095323	isocitrate lyase [Phytophthora infestans T30-4]	2e-77	sq381189f2/ Alexandrium catenella ACC07	160	100
53	gi|223937170	UTP--glucose-1-phosphate uridylyltransferase [bacterium Ellin514]	2e-36	UI-D-GC1-aay-o-10-0-UI.s1 UI-D-GC1/ Alexandrium tamarense	327	100
75	gi|242016713	Hypoxia-inducible factor 1 alpha inhibitor, putative [Pediculus humanus corporis]	5e-21	UI-EH-HG2-abg-j-14-0-UI.s1 UI-EH-HG2 /Emiliania huxleyi	38	95.311
81	gi|71032509	60S ribosomal protein L13 [Theileria parva strain Muguga]	3e-53	sq8f7fa01a/ Alexandrium catenella ACC07	151	100
92	gi|110681356	malyl-CoA lyase [Roseobacter denitrificans OCh 114]	7e-67	ZooX004E09.g_071/ Symbiodinium	146	100
100	gi|297328478	hypothetical protein ARALYDRAFT_478305 [Arabidopsis lyrata subsp. lyrata]	4e-40	UI-D-GC1-aab-e-18-0-UI.s1 UI-D-GC1/ Alexandrium tamarense	213	100
115	gi|156402513	predicted protein [Nematostella vectensis]	2e-98	av01021e02r1.1 /Symbiotic sea anemone	40	97.249
118	gi|294947032	vacuolar ATP synthase 21 kDa proteolipid subunit[Perkinsus marinus ATCC 50983]	1e-74	PMEA642TO/ Perkinsus marinus	46	99.208
137	gi|294950073	proteasome subunit, beta type, 7, putative [Perkinsus marinus ATCC 50983]	3e-72	sq8070a4c3/ Alexandrium catenella ACC07	238	100
143	gi|115472755	Os07g0558500 [Oryza sativa (japonica cultivar-group)]	2e-19	sq268bad03/ Alexandrium catenella ACC07	128	100
173	gi|82658842	copper/zinc superoxide dismutase [Ulva fasciata]	5e-42	UI-D-GC1-aal-p-20-0-UI.s1 UI-D-GC1/ Alexandrium tamarense	308	100
175	gi|82658842	copper/zinc superoxide dismutase [Ulva fasciata]	5e-42	UI-D-GC1-aal-p-20-0-UI.s1 UI-D-GC1 /Alexandrium tamarense	294	100
189	gi|294872348	ubiquinol-cytochrome C reductase complex 14kD subunit, putative [Perkinsus marinus ATCC 50983]	2e-44	UI-D-GC1-aag-e-02-0-UI.s1 UI-D-GC1 /Alexandrium tamarense	114	100
203	gi|294950389	translation initiation inhibitor, putative [Perkinsus marinus ATCC 50983]	3e-30	UI-D-GC1-abk-e-24-0-UI.s1 UI-D-GC1/ Alexandrium tamarense	124	100
211	gi|20269863	peroxiredoxin V protein [Branchiostoma belcheri tsingtauense]	5e-43	UI-D-GC1-aaj-o-22-0-UI.s1 UI-D-GC1 /Alexandrium tamarense	201	100

## Sheet: De novo sequencing and MS-BLAST
40 Proteins identified by de novo sequencing and MS-BLAST
Spot No.	Accession No.	Protein Name	Species	Total HSP	Peptide counts	Pep. Counts of which HSP>62	Two unique peptides’ & HSP>104	Three unique peptides & HSP>134
6 proteins matched in dinoflagellates
130	gi|3355318	peridinin-chlorophyll a protein, high-salt form	Amphidinium carterae	253	2	2
131	gi|3355318	peridinin-chlorophyll a protein, high-salt form	Amphidinium carterae	236	2	2
134	gi|3355318	peridinin-chlorophyll a protein, high-salt form	Amphidinium carterae	521	3	2
141	gi|3355318	peridinin-chlorophyll a protein, high-salt form	Amphidinium carterae	407	4	2
149	gi|1709610	Peridinin-chlorophyll a-binding protein 3	Amphidinium carterae	170	3	1	y	y
156	gi|3355318	peridinin-chlorophyll a protein, high-salt form	Amphidinium carterae	468	8	3
1 proteins matched in non-dinoflagellate algae
124	gi|116059261	phosphoglycolate phosphatase precursor	Ostreococcus tauri	121	2	1	y
33 proteins matched in other organism species
3	gi|46128593	hypothetical protein FG08674.1	Gibberella zeae PH-1	63	1	1
11	gi|116627484	Peptidoglycan interpeptide bridge formation enzyme	Streptococcus thermophilus LMD-9	68	1	1
18	gi|114559688	hypothetical protein isoform 5	Pan troglodytes	96	1	1
20	gi|88805752	hypothetical protein RB2501_15469	Robiginitalea biformata HTCC2501	235	5	1	y	y
22	gi|125978094	GA19105-PA	uncultured bacterium	111	2	1	y
23	gi|78061935	Adenylylsulfate kinase	Burkholderia sp. 383	72	1	1
26	gi|126008100	hypothetical protein Faci_03001304	Ferroplasma acidarmanus fer1	106	2	1	y
77	gi|84321573	COG0304: 3-oxoacyl-(acyl-carrier-protein) synthase	Pseudomonas aeruginosa C3719	293	5	1	y	y
96	gi|89211115	L-aspartate oxidase	Halothermothrix orenii H 168	144	3	1	y	y
99	gi|117923844	protease Do	Magnetococcus sp. MC-1	160	3	1	y	y
103	gi|115524987	peptidase M48, Ste24p	Rhodopseudomonas palustris BisA53	75	1	1
116	gi|86142389	hypothetical protein MED217_12104	Bacillus licheniformis DSM 13	107	2	1	y
117	gi|120403185	signal peptidase I	Mycobacterium vanbaalenii PYR-1	136	3	1	n	y
119	gi|91772432	Aspartate-semialdehyde dehydrogenase, USG-1 related	Methanococcoides burtonii DSM 6242	229	4	1	y	y
123	gi|18310662	polyribonucleotide nucleotidyltransferase	Clostridium perfringens str. 13	116	2	1	y
126	gi|118715754	Alcohol dehydrogenase GroES domain protein	Burkholderia multivorans ATCC 17616	148	3	0	y	y
127	gi|116669653	isocitrate dehydrogenase, NADP-dependent	Arthrobacter sp. FB24	225	5	0	y	y
128	gi|487791	GF14omega isoform	Arabidopsis thaliana	337	7	2
135	gi|56783656	hypothetical protein	Oryza sativa (japonica cultivar-group)	75	1	1
138	gi|13991680	proteasome subunit N3	Oncorhynchus mykiss	202	4	1	y	y
148	gi|115455549	Os03g0765200	Oryza sativa (japonica cultivar-group)	185	4	1	y	y
164	gi|83319459	cation-transporting ATPase, E1-E2 family	Mycoplasma capricolum subsp. capricolum ATCC 27343	108	2	1	y
165	gi|85858990	calcium-transporting ATPase	Syntrophus aciditrophicus SB	187	4	0	y	y
167	gi|58332308	hypothetical protein LOC496467	Xenopus tropicalis	189	4	1	y	y
168	gi|15676849	dihydrolipoamide acetyltransferase	Neisseria meningitidis MC58	145	3	0	n	y
170	gi|118085577	family with sequence similarity 62 (C2 domain containing) member B	Gallus gallus	74	1	1
172	gi|57335883	light harvesting protein 2	Guillardia theta	206	3	1	y	y
196	gi|68231071	G-protein beta WD-40 repeat	Frankia sp. EAN1pec	107	2	0	y
202	gi|123478681	hypothetical protein TVAG_047010	Trichomonas vaginalis G3	65	1	1
204	gi|91199703	putative nitrogen regulatory protein	Streptomyces ambofaciens ATCC 23877	109	2	0	y
205	gi|124521098	Amidase	Bacillus coagulans	148	3	1	y	y
206	gi|87242400	flagellin	Bacillus thuringiensis serovar japonensis	252	5	0	y	y
207	gi|76795791	DNA polymerase A	Thermoanaerobacter ethanolicus ATCC 33223	105	2	1	y

## Sheet: Biological Process
Biological Process	Spot No.	Protein Name	GI number
Amino acid metabolism	40	adenosylhomocysteinase	211939908
Amino acid metabolism	23	Adenylyl sulfate kinase	78061935
Amino acid metabolism	69	glutamate semialdehyde synthase	193890955
Amino acid metabolism	27	glutamine synthetase, catalytic region	182420159
Amino acid metabolism	47	ketol-acid reductoisomerase	227357190
Amino acid metabolism	38	methionine adenosyltransferase-like	94536641
Amino acid metabolism	36	methionine S-adenosyl transferase	225685863
Amino acid metabolism	39	methionine S-adenosyl transferase	225685865
Amino acid metabolism	35，37	probable S-adenosylmethionine synthetase	223998420
Amino acid metabolism	42	S-adenosyl-homocysteine hydrolase like protein	4416330
Antioxidant	163	conserved hypothetical protein	157093395
Antioxidant	66173175	copper/zinc superoxide dismutase	82658842
Antioxidant	211	peroxiredoxin V protein	20269863
Antioxidant	67	Superoxide dismutase	145532645
Carbohydrate metabolic	126	Alcohol dehydrogenase GroES domain protein	118715754
Carbohydrate metabolic	31	glucose-methanol-choline oxidoreductase	119383846
Carbohydrate metabolic	11	Peptidoglycan interpeptide bridge formation enzyme	116627484
Carbohydrate metabolic	62	predicted protein	159472657
Cell cycle and division	212	cell division protein FtsZ	118590886
Cell cycle and division	155	DNA damage checkpoint protein rad24	134037084
Cell structure and motility	106	actin	5114428
Cell structure and motility	59，61	actin	134037068
Cell structure and motility	110	beta-tubulin	157093091
Cell structure and motility	112	beta-tubulin	156144851
Cell structure and motility	206	flagellin	87242400
Cell structure and motility	98	truncated actin	193890884
DNA replication and repair	207	DNA polymerase A	76795791
Electron transport chain	189	ubiquinol-cytochrome C reductase complex 14kD subunit, putative	294872348
Glycolysis	72，73，151	cytosolic class II fructose bisphosphate aldolase	56112311
Glycolysis	24	enolase	1161573
Glycolysis	46	enolase	32440997
Glycolysis	104	fructose-bisphosphate aldolase	219114000
Glycolysis	146	glyceraldehyde-3-phosphate dehydrogenase	56964470
Glycolysis	82，85，86	glyceraldehyde-3-phosphate dehydrogenase	134037044
Glycolysis	51，60	glyceraldehyde-3-phosphate dehydrogenase, type I	57505272
Glycolysis	13	phosphoglucomutase	57335913
Glycolysis	125	phosphoglycerate kinase	58613475
Glycolysis	144153	triose-phosphate isomerase	157093165
Glyoxylate cycle	29，32，33，34	isocitrate lyase	301111828
Glyoxylate cycle	124	phosphoglycolate phosphatase precursor	116059261
Intracellular trafficking	171	ADP-ribosylation factor-like 2	242247487
Intracellular trafficking	117	signal peptidase I	120403185
Lipid metabolism	77	COG0304: 3-oxoacyl-(acyl-carrier-protein) synthase	84321573
Nucleotide metabolism	100	hypothetical protein ARALYDRAFT_478305	297328478
Nucleotide metabolism	41	hypothetical protein Tb10.6k15.3460	134037090
Nucleotide metabolism	96	L-aspartate oxidase	89211115
Nucleotide metabolism	55	predicted protein	226460043
Other enzymatic processes	205	Amidase	124521098
Other enzymatic processes	119	Aspartate-semialdehyde dehydrogenase, USG-1 related	91772432
Other enzymatic processes	122	delta-aminolevulinic acid dehydratase	118587975
Other enzymatic processes	145	glutathione s-transferase	224014250
Other enzymatic processes	16	H+-or Na+-translocating f-type, v-type and A-type ATPase superfamily	226463106
Other enzymatic processes	132	inorganic pyrophosphatase	224005631
Other enzymatic processes	92	malyl-CoA lyase	110681356
Other enzymatic processes	162	single domain cyclophilin-type peptidyl-prolyl cis-trans protein	112253632
Other enzymatic processes	53	UTP--glucose-1-phosphate uridylyltransferase	223937170
Other function	209	hypothetical protein CC1G_03516	169851626
Other function	188	hypothetical protein CHGG_06467	116193499
Other function	113	nucleoredoxin	193890965
Other function	143	Os07g0558500	115472755
Other function	115	predicted protein	156402513
Other function	1	unknown	148907083
Other function	8,9	unnamed protein product	270226122
Other function and unknown	169	conserved hypothetical protein	239885075
Other function and unknown	170	family with sequence similarity 62 (C2 domain containing) member B	118085577
Other function and unknown	22	GA19105-PA	125978094
Other function and unknown	196	G-protein beta WD-40 repeat	68231071
Other function and unknown	135	hypothetical protein	56783656
Other function and unknown	64	hypothetical protein	145541453
Photosynthesis	181182193214215	chlorophyll a/c- binding protein	53748880
Photosynthesis	191192	chlorophyll A-C binding protein	27450755
Photosynthesis	21	chloroplast transketolase	58613541
Photosynthesis	50，54	chloroplast ATP synthase gamma subunit	58613419
Photosynthesis	201	chloroplast cytochrome b6	58613435
Photosynthesis	80，83，84，87，88，89，90，91	chloroplast ferredoxin-NADP{+) reductase	58613455
Photosynthesis	63，68	chloroplast glyceraldehyde-3-phosphate dehydrogenase	58618206
Photosynthesis	71	chloroplast glyceraldehyde-3-phosphate dehydrogenase	117959253
Photosynthesis	187	chloroplast light harvesting complex protein	58613559
Photosynthesis	180	chloroplast light harvesting complex protein	58613547
Photosynthesis	166178179	chloroplast light harvesting complex protein	58613553
Photosynthesis	183	chloroplast light harvesting complex protein	58613573
Photosynthesis	65	chloroplast phosphoglycerate kinase	58613473
Photosynthesis	105107121120	chloroplast phosphoribulokinase	60101676
Photosynthesis	108	chloroplast phosphoribulokinase 2	60101678
Photosynthesis	97	form II ribulose-1,5-bisphosphate carboxylase/oxygenase large subunit	209575510
Photosynthesis	79	geranylgeranyl reductase	89474863
Photosynthesis	172	light harvesting protein 2	57335883
Photosynthesis	194198	light-harvesting chlorophyll a-c binding protein	757520
Photosynthesis	174184185186213	light-harvesting polyprotein precursor	3355306
Photosynthesis	190	light-harvesting protein	306430549
Photosynthesis	160161195199200	light-harvesting protein	306430557
Photosynthesis	176177	light-harvesting protein	306430565
Photosynthesis	130131134141156	peridinin-chlorophyll a protein, high-salt form	3355318
Photosynthesis	149	Peridinin-chlorophyll a-binding protein 3	1709610
Photosynthesis	216	photosystem I subunit VII	116071645
Photosynthesis	102	plastid fructose-1,6-bisphosphate aldolase class II protein precursor	104641008
Photosynthesis	136139142140	plastid oxygen-evolving enhancer 1-2 precursor	134037072
Photosynthesis	123	polyribonucleotide nucleotidyltransferase	18310662
Photosynthesis	210	PsbV	118411006
Photosynthesis	45	ribulose 1,5-bisphosphate carboxylase oxygenase large subunit	33317821
Photosynthesis	101157	Ribulose bisphosphate carboxylase, chloroplastic;	75284311
Photosynthesis	152	ribulose-5-phosphate 3-epimerase	86160387
Photosynthesis	CR1,CR2,CR3,CR4	ribulose 1,5-bisphosphate carboxylase oxygenase form II	37731851
Protein modification and folding	114	calrectulin	58613583
Protein modification and folding	103	peptidase M48, Ste24p	115524987
Protein modification and folding	99	protease Do	117923844
Protein modification and folding	138	proteasome subunit N3	13991680
Protein modification and folding	137	proteasome subunit, beta type, 7, putative	294950073
Protein modification and folding	133	threonine endopeptidase	134037046
Protein synthesis and degradation	49	26S protease subunit regulatory subunit 6a	70951687
Protein synthesis and degradation	81	60S ribosomal protein L13	71032509
Protein synthesis and degradation	56	elongation factor Tu	78779984
Protein synthesis and degradation	167	hypothetical protein LOC496467	58332308
Protein synthesis and degradation	148	Os03g0765200	115455549
Protein synthesis and degradation	203	translation initiation inhibitor, putative	294950389
Protein synthesis and degradation	57	translational elongation factor Tu	224179460
signalling	128	GF14 omega isoform	487791
Stress response and chaperones	15，17	BiP	20198944
Stress response and chaperones	10	heat shock protein 60	21105712
Stress response and chaperones	12	heat shock protein 60	24637539
Stress response and chaperones	4，5，7	heat shock protein 70	112253644
Stress response and chaperones	6	heat shock protein 70, putative	237836239
Stress response and chaperones	158	heat shock protein 90	99643822
Stress response and chaperones	2	heat shock protein HSP70 homologue	84994486
Stress response and chaperones	14	PREDICTED: similar to GroEL-like chaperone, ATPase	225433375
TCA cycle	28	conserved hypothetical protein	239897902
TCA cycle	30	conserved hypothetical protein	294868298
TCA cycle	168	dihydrolipoamide acetyltransferase	15676849
TCA cycle	127	isocitrate dehydrogenase, NADP-dependent	116669653
TCA cycle	93	malate dehydrogenase precursor	2827080
TCA cycle	95	putative mitochondrial malate dehydrogenase	48375044
Transcription	74	ATP-dependent helicase, putative	237831253
Transcription	75	Hypoxia-inducible factor 1 alpha inhibitor, putative	242016713
Transcription	19	pseudouridine synthase	146282670
Transport	165	calcium-transporting ATPase	85858990
Transport	164	cation-transporting ATPase, E1-E2 family	83319459
Transport	48	Chain A, The Crystal Structure And Amino Acid Sequence Of Dehaloperoxidase From Amphitrite Ornata Indicate Common Ancestry With Globins	8569636
Transport	150	conserved hypothetical protein	161898187
Transport	109	F0F1 ATP synthase subunit beta	71082935
Transport	202	hypothetical protein TVAG_047010	123478681
Transport	147	PREDICTED: hypothetical protein	225464033
Transport	44	putative vacuolar H+ ATPase subunit B	27901531
Transport	118	vacuolar ATP synthase 21 kDa proteolipid subunit, putative	294947032
Unknown	26	hypothetical protein Faci_03001304	126008100
Unknown	3	hypothetical protein FG08674.1	46128593
Unknown	18	hypothetical protein isoform 5	114559688
Unknown	116	hypothetical protein MED217_12104	86142389
Unknown	129	hypothetical protein Pmar_PMAR003554	239897329
Unknown	70，78	hypothetical protein Pnap_4911	121583281
Unknown	20	hypothetical protein RB2501_15469	88805752
Unknown	197	hypothetical protein, conserved	261334958
Unknown	208	pannexin 2	54398902
	52，58	plastid protein NAP50	257480821
Unknown	76	predicted gene, EG668137	218505708
Unknown	154	predicted protein	223995719
Unknown	204	putative nitrogen regulatory protein	91199703
Unknown	159	unknown protein	58613603
Unknown	25，43，94，111
